# Supplementary material
Source: PubMed Central journal article supplement (PMC5135094)
Supplement: NIHMS832626-supplement-Supplementary_Material.pdf [file NIHMS832626-supplement-Supplementary_Material.pdf]

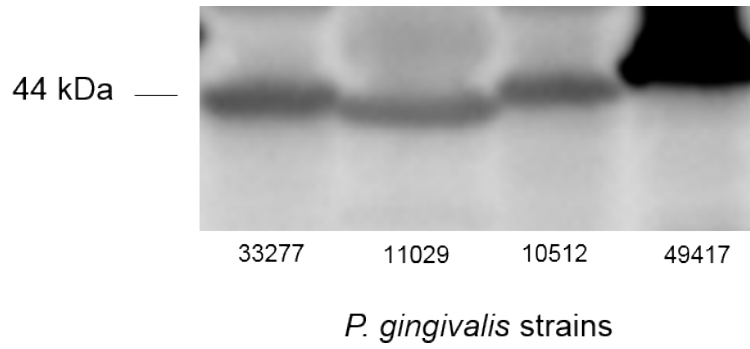

Figure S1. Immunoblot of whole cell lysates of *P. gingivalis* strains probed with polyclonal antibodies to the FimA protein of strain 33277.

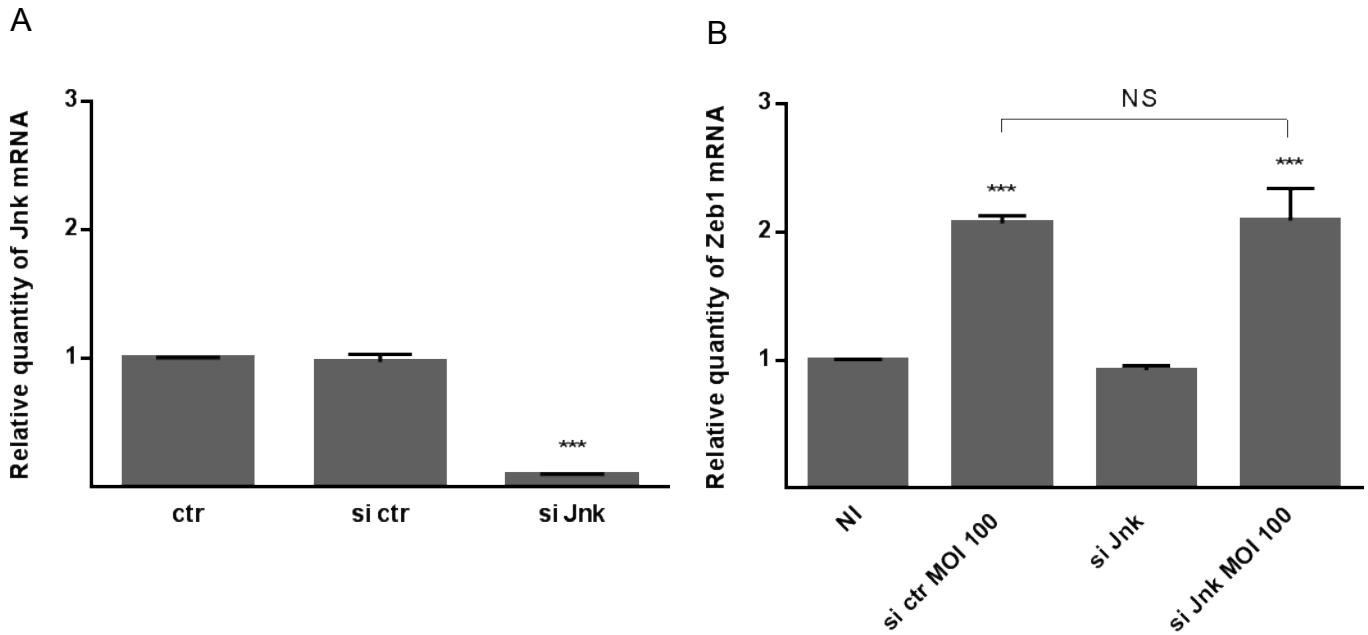

Figure S2. JNK knockdown does not affect regulation of Zeb1 by *P. gingivalis*.

A. TIGK cells were transiently transfected with siRNA to JNK1/2 (si Jnk, 100 nM, Sigma) or scrambled siRNA (si ctr). Control (ctr) cells were nontransfected. JNK mRNA levels in transfected cells were measured by qRT-PCR. Data were normalized to GAPDH mRNA and expressed relative to ctr. Results are means  $\pm$  SD, n = 3; \*\*\* P < 0.001;

B. Transfected TIGK cells were infected with *P. gingivalis* 33277 for 24 h at MOI 100. ZEB1 mRNA was measured by qRT-PCR, the data were normalized to GAPDH mRNA and are expressed relative to the noninfected (NI) control. Results are means  $\pm$  SD, n = 3; \*\*\* P < 0.001 compared to NI; NS: not significant.

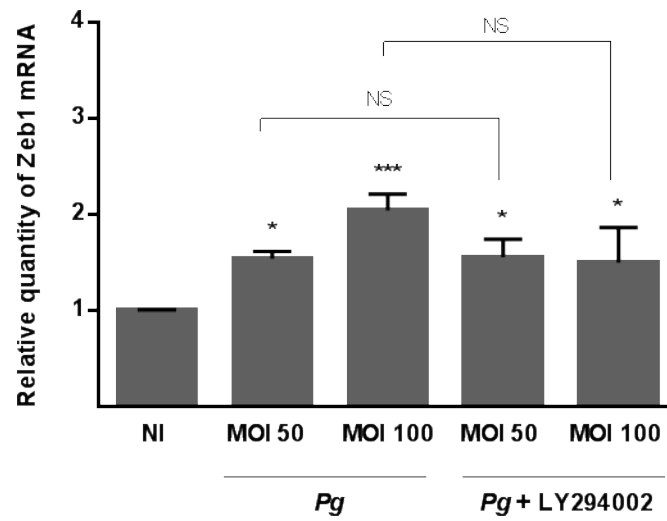

Figure S3. Pharmacological inhibition of Akt does not affect regulation of Zeb1 by *P. gingivalis*.

TIGK cells were preincubated with 10  $\mu$ M LY294002 or vehicle (DMSO) only for 1 h and infected with *P. gingivalis* 33277 MOI 50 or 100 for 6 h. Zeb1 mRNA levels were measured by qRT-PCR, normalized to GAPDH mRNA and expressed relative to noninfected (NI) controls. Results are means  $\pm$  SD, n = 3; \* P < 0.05; \*\*\* P < 0.001; NS: not significant.

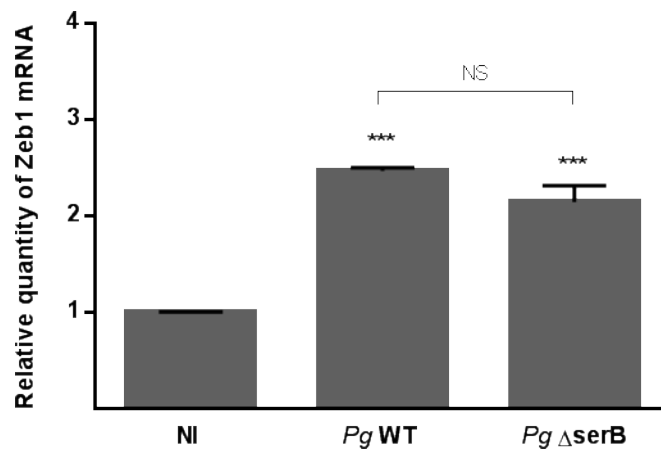

Figure S4. A non-invasive mutant of *P. gingivalis* can induce ZEB1 expression. qRT-PCR of ZEB1 mRNA expression in TIGK cells infected with *P. gingivalis* 33277 (Pg WT) or a  $\Delta$ serB mutant. Data were normalized to GAPDH mRNA and are expressed relative to noninfected (NI) controls. Results are means  $\pm$  SD, n = 3; \*\*\* P < 0.001 compared to NI; NS: not significant.

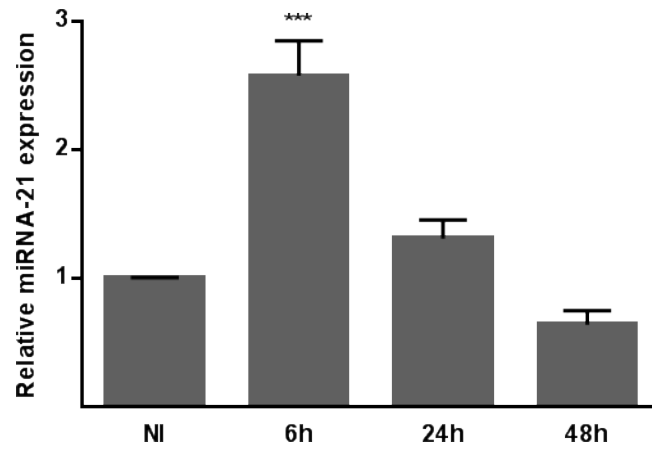

Figure S5. Expression of miRNA-21 is not down-regulated by *P. gingivalis*. TIGK cells were infected with *P. gingivalis* 33277 (Pg) at MOI 100 for the time indicated. miRNA levels were measured by qRT-PCR, normalized to RNU48 miRNA, and expressed relative to noninfected (NI) controls. Results are means  $\pm$  SD, n = 3; \*\*\* P < 0.001 compared to NI.

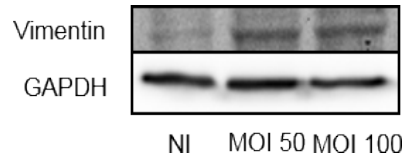

Figure S6. *P. gingivalis* increases expression of vimentin. Immunoblot of lysates of TIGK cells infected with *P. gingivalis* 33277 for 24 h at the MOI indicated. Control cells were uninfected (NI). Duplicate blots were probed with antibodies to vimentin or GAPDH (loading control).

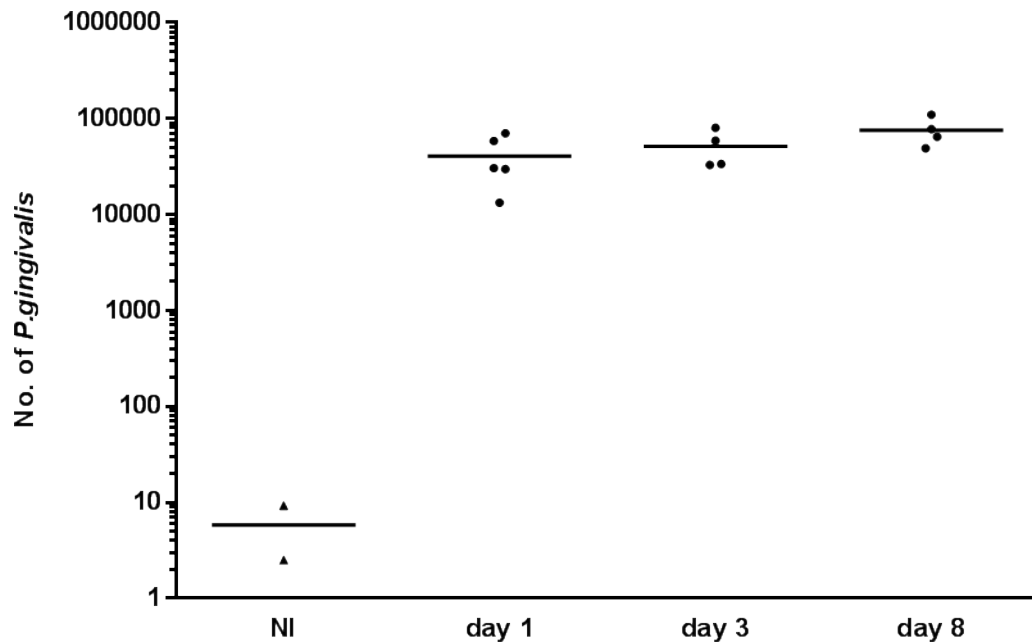

Figure S7. Colonization of mice. Mice were orally infected with  $10^7$  cfu *P. gingivalis* five times at 2-days intervals. Bacterial samples were collected along the gingiva of the upper molars. Samples were lysed, DNA extracted and qPCR performed with primers specific for *P. gingivalis* 16S DNA. For enumeration, genomic DNA was isolated from laboratory cultures of *P. gingivalis* 33277 (numbers determined by viable counting) and a series of dilutions prepared. The number of gene copies in the oral samples was determined by comparison with the standard curve. In the sham infected animals, 2 of 5 mice were colonized with low levels of organisms sufficient similar to *P. gingivalis* to give a positive result. *P. gingivalis* levels from day 1, 3 and 8 were statistically greater than sham infected ( $P < 0.0001$ ) but were not statistically different from each other.

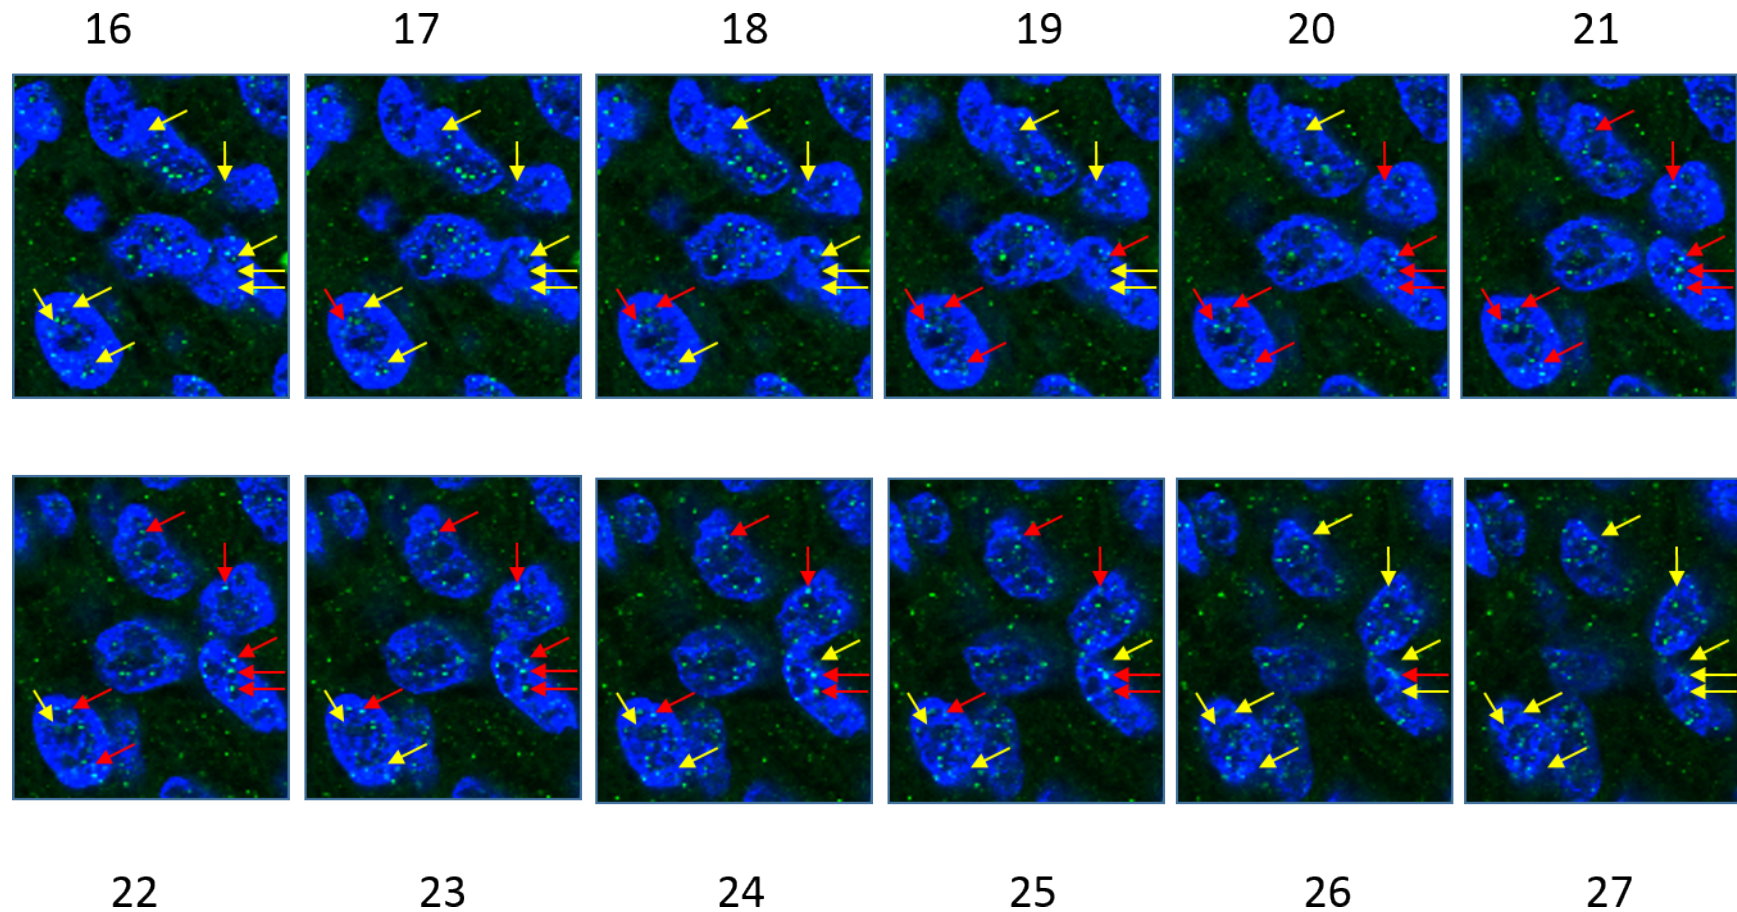

Figure S8. Fluorescent confocal microscopy of a carcinoma in situ biopsy sample probed with *P. gingivalis* antibodies (green) and stained with DAPI (blue). Cells were imaged at magnification x63. Red arrows point to a discrete fluorescent spot, yellow arrows indicate the same position where that spot is absent. Numbers are the slice number in an optical stack of 40 slices at 0.4  $\mu\text{m}$ . Fluorescent spots are present in typically 5 to 7 adjacent optical slices (0.4  $\mu\text{m}$  slices), indicating that the fluorescent particles are about 2.0 to 2.8  $\mu\text{m}$  in size, consistent with the size of *P. gingivalis*.
